# Supplementary material for: Confined alkali metal ions in two-dimensional aluminum phosphate promoted activity for the condensation of lactic acid to 2,3-pentanedione
Source: Royal Society of Chemistry journal article supplement (doi:10.1039/d1nj02070f), 2021-01-01
Supplement: d1nj02070f1.pdf [file d1nj02070f1.pdf]

---

Supporting Information

**Confined alkali metal ion in two-dimensional aluminum phosphate promoted activity for condensation of lactic acid to 2,3-pentanedione**

Xinli Li<sup>a</sup>, Ju Zhang<sup>a</sup>, Yunsheng Dai<sup>b\*</sup>, Congming Tang<sup>a\*</sup> and Chenglong Yang<sup>c</sup>

(<sup>a</sup>School of Chemistry and Chemical Engineering, Chongqing University of Technology, Chongqing 400054, PR China; <sup>b</sup>Sino-Platinum Metals Co., Ltd., Kunming 650106, PR China; <sup>c</sup>Chongqing Kunding Environmental Protection Technology Co., Ltd., Chongqing 400000, PR China)

**1 Experimental section**

**1.1 Catalyst evaluation**

The condensation of lactic acid to 2,3-pentanedione was performed with a continuous-flow fixed-bed quartz tubular reactor (4 mm, inner diameter) under atmospheric pressure. 0.19 mL catalyst (20–40 mesh) was placed between two layers of quartz wools inside the reactor. The sample was heated from room temperature to 270°C at a rate of 5°C min<sup>-1</sup> and kept at that temperature for 1 h by flowing carrier gas of N<sub>2</sub> (1.2 mL min<sup>-1</sup>) to remove any surface impurities. Then aqueous solution of 20.0 wt.% LA (1.0 mL h<sup>-1</sup>) was introduced into the reactor, and the reaction was tested for about 10 h. The liquid products were condensed using ice-water bath and analyzed offline using SP-6890 gas chromatograph (GC) with a FFAP capillary column connected to a FID. Quantitative analysis of the products was carried out by the internal standard method using isopropanol as the internal standard material. GC-MS analyses of the samples were performed using Agilent 5973N Mass Selective Detector attachment. The reaction tail gas was analyzed online using GC with a packed column of TDX-01 connected to TCD detector. The conversion of LA and the selectivity toward 2,3-pentanedione or other by-products were calculated according to equations (1) and (2).

$$\text{Conversion / \%} = \frac{n_0 - n_1}{n_0} \times 100 \quad \text{----- (1),} \quad \text{Selectivity / \%} = \frac{n_p}{n_0 - n_1} \times 100 \quad \text{----- (2)}$$

Where  $n_0$  is the molar quantity of LA fed into reactor,  $n_1$  is the molar quantity of LA in the effluent, and  $n_p$  is the molar quantity of lactic acid converted to 2,3-pentanedione or other byproducts such as acetaldehyde, propionic acid, acrylic acid, and acetic acid.

---

\* Corresponding author. Tel.: +86 23 62563250

E-mail address: daiysh@ipm.com.cn (Y. S. Dai) and tcmtang2001@cqut.edu.cn (C. M. Tang).

## 2 Results and discussion

### 2.1 Molecular diameter and Molecular mean free path

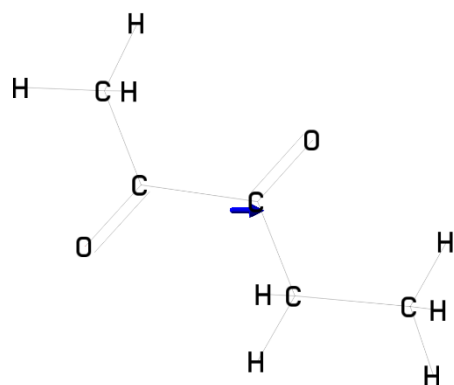

2,3-pentanedione

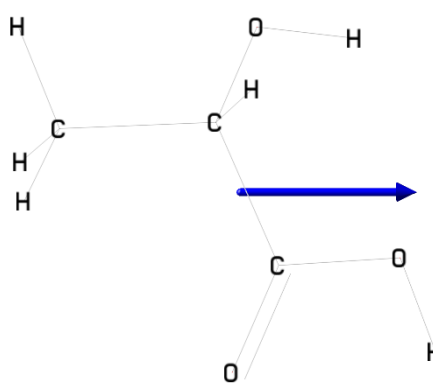

lactic acid

|                                      | 2,3-pentanedione | lactic acid |
|--------------------------------------|------------------|-------------|
| Molecular volume V (Å <sup>3</sup> ) | 136.41           | 107.53      |
| Molecular diameter D (Å)             | 6.4              | 5.9         |
| Molecular mean free path S (nm)      | 41               | 48          |

\* Molecular volume V of 2,3-pentanedione and lactic acid is calculated with Gaussian by b3lyp/6-31g(d). Molecular diameter (D) is determined according to equation (a), and molecular mean free path is determined with equation (b).

$$V = \frac{4}{3} \times \pi \times \left(\frac{D}{2}\right)^3, \quad D = \sqrt[3]{\frac{6V}{\pi}} \text{---(a)}$$

$$S = \frac{1.38 \times 10^{-23} \times T}{\sqrt{2} \pi \times D^2 \times P} \times 10^9 \text{---(b)}$$

Where S is the molecular mean free path (nm); T is reaction temperature (K), 543K; P is reaction pressure (Pa), atmospheric pressure,  $1.013 \times 10^5$  Pa; D is molecular diameter (m).

## 2.2 Diffusion type

(1) Molecular diffusion (bulk diffusion)

$$\frac{d}{S} \geq 100,$$

(2) Knudsen diffusion

$$\frac{d}{S} \leq 0.1,$$

(3) Molecular diffusion-Knudsen diffusion coexistence

$$0.1 < \frac{d}{S} < 100,$$

Where d is the pore diameter (nm) of porous material, and S is molecular mean free path (nm).

## 2.3 Acidic-basic property

**Table S1** CO<sub>2</sub>/NH<sub>3</sub>-TPD of samples

| Catalyst (intercalated alkali metal ion) | Peak area for CO <sub>2</sub> -TPD (basic sites) $\times 10^5$ | Peak area for NH <sub>3</sub> -TPD (acidic sites) $\times 10^4$ | Ratio of basicity/acidity |
|------------------------------------------|----------------------------------------------------------------|-----------------------------------------------------------------|---------------------------|
| blank                                    | 1.68                                                           | 1.36                                                            | 12.4                      |
| Na <sup>+</sup>                          | 2.03                                                           | 1.98                                                            | 10.3                      |
| K <sup>+</sup>                           | 1.65                                                           | 1.94                                                            | 8.5                       |
| Rb <sup>+</sup>                          | 1.22                                                           | 2.05                                                            | 5.9                       |
| Cs <sup>+</sup>                          | 1.26                                                           | 1.65                                                            | 7.6                       |

## 2.4 TG and DTA

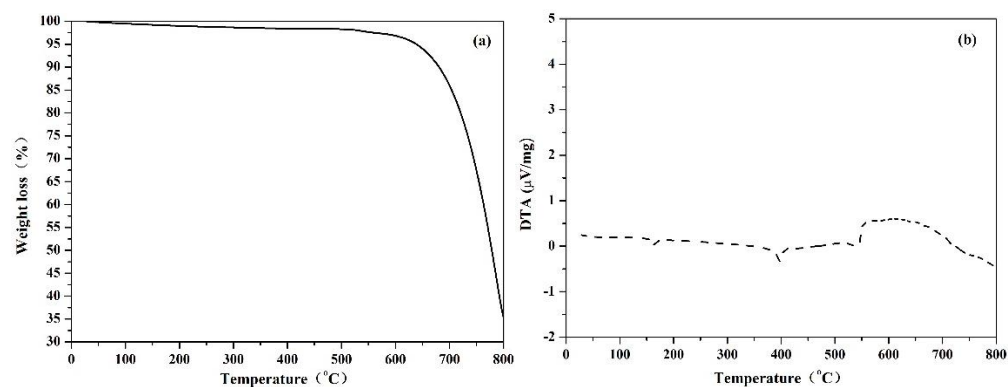

**Figure S1** TG profiles of the intercalated Cs<sup>+</sup> /laminar aluminum phosphate after reaction in the presence of only water (without LA) (a) and their corresponding DTA (b)
